# Supplementary material for: Endogenous activated small interfering RNAs in virus‐infected Brassicaceae crops show a common host gene‐silencing pattern affecting photosynthesis and stress response
Source: PubMed Central journal article supplement — New Phytol. 2020 Oct 14;229(3):1650–64. doi: 10.1111/nph.16932 (PMC7821159; doi:10.1111/nph.16932), 2020-10-14
Supplement: NPH-229-1650-s001.pdf [file NPH-229-1650-s001.pdf]

### **New Phytologist Supporting Information**

Article title: **Endogenous activated siRNAs in virus-infected *Brassicaceae* crops show a common host gene silencing pattern affecting photosynthesis and stress-response.**

Authors: Paola Leonetti, Aysan Ghasemzadeh, Arianna Consiglio, Torsten Gursinsky, Sven-Erik Behrens, Vitantonio Pantaleo.

Article acceptance date: 4th September 2020

The following Supporting Information is available for this article:

**Fig. S1. Schematic representation of the machine learning structure for image analyses and tissues selection.**

**Fig. S2. Size distribution profile of unique and redundant CaMV-derived siRNAs (vsiRNAs), in Turnip and Oilseed Rape.**

**Fig. S3. Origin of sRNAs in *Arabidopsis thaliana*, Turnip and Oilseed Rape infected by CaMV.**

**Fig. S4. PCR amplicons for T7 *in vitro* transcripts used in cleavage assays.**

**Fig. S5. Alignments of the Sanger-sequenced amplicons (RCA, HSP70-1, LHCB1.3 ) obtained from Oilseed Rape with the orthologues in Turnip.**

**Fig. S6. 21- and 22-nt vasiRNAs Distribution and Phasing in *Arabidopsis thaliana*, Turnip and Oilseed Rape.**

**Fig. S7. Detection of antisense LHCB1.3 transcripts.**

**Table S1. Primers used in this study. (In bold and underlined the T7 promoter sequence).**

**Table S2. Statistic of small RNAs from *Arabidopsis thaliana* and Brassica sp. related to Fig.1b.**

**Table S3.  $\chi^2$  test and fold change evaluation for unique read counts, grouped by length.**

**Related to Fig. 1d.**

**Table S4. Output of unique 21-nt, 22-nt vasiRNA analysis in mock-treated and CaMV-infected tissues, referred to each gene in Table 1.**

**Table S5. Microarray comparison of expression profiles of CP5, HSP70-1 and SAP.**

**Fig. S1. Schematic representation of the machine learning structure for image analyses and tissues selection.** (a) Input leaves images from either mock-treated or CaMV-infected turnip and oilseed rape were submitted to a machine learning process with the architecture of DeepLab v3+ CNN based classifier in order to classify the leaves in symptomatic or symptomless. (b) Accuracy of the classifier, determined over the validation set.

(a)

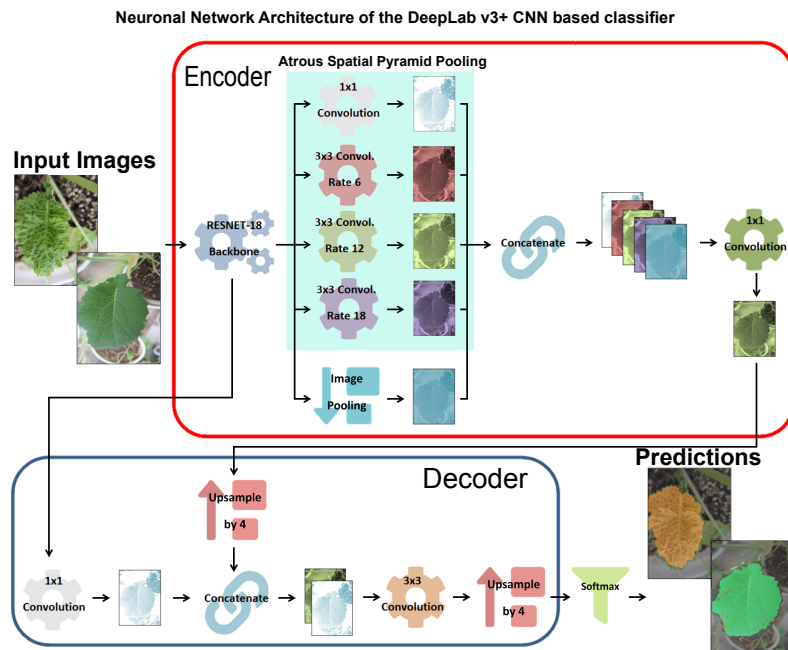

(b)

| Ground truth classes | Accuracy |
|----------------------|----------|
| Background           | 0.94928  |
| Symptomless leaves   | 0.93291  |
| Symptomatic leaves   | 0.97427  |

**Fig. S2.** Size distribution profile of unique and redundant CaMV-derived siRNAs (vsiRNAs), in Turnip and Oilseed Rape.

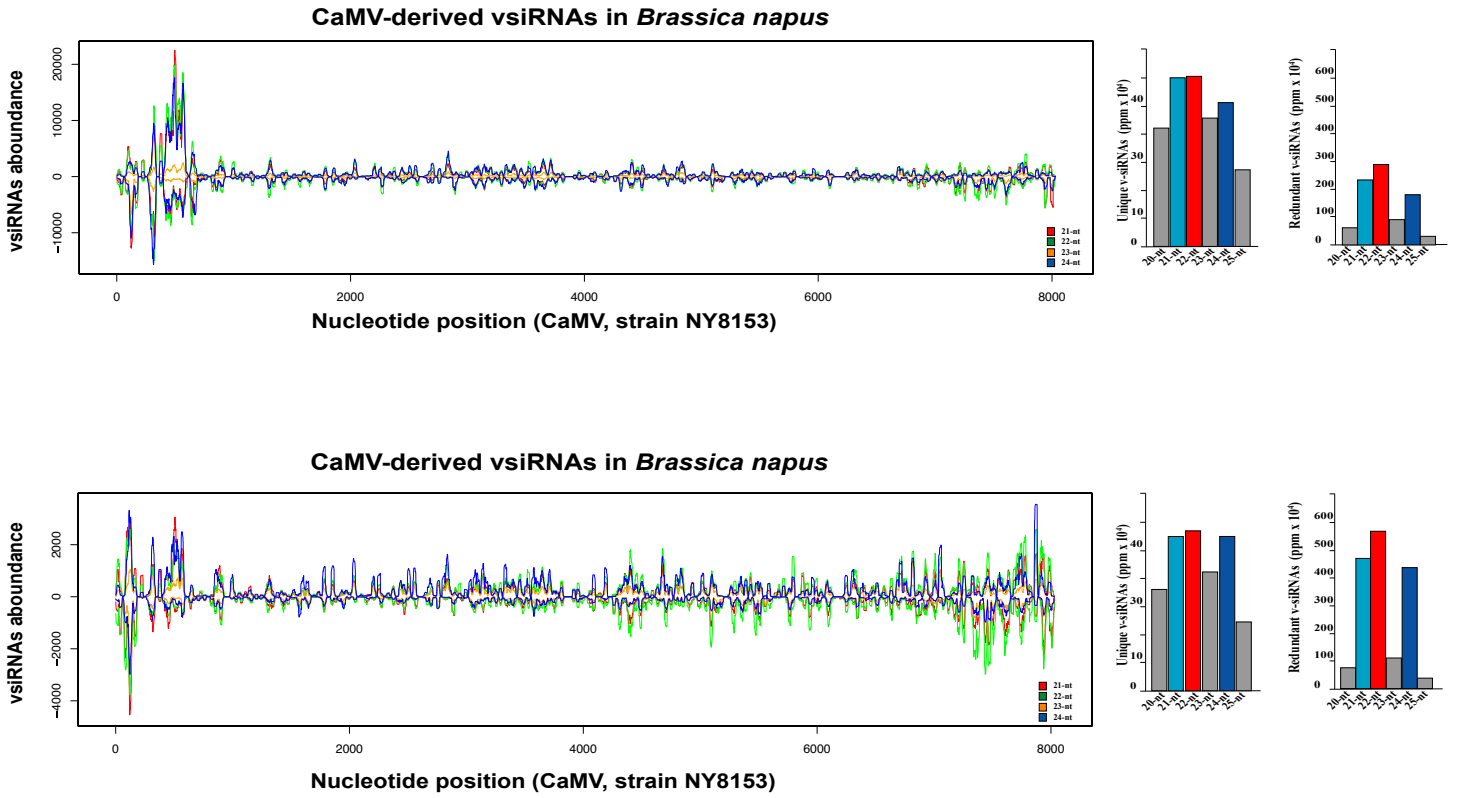



**Fig. S4. PCR amplicons for T7 in vitro transcripts used in cleavage assays.** Amplified products were eluted from the gel with Kit Promega in 40  $\mu$ l water following the manufacturer instructions. 5  $\mu$ l of DNA fragment was resolved in 1.2% agarose in order to verify the expected size. 5  $\mu$ l were sequenced using the reverse oligonucleotide (denoted as "R" in **Table S4**). Amplicon T7 RCA of 875 bp (lane 1), T7 HSP70-1 of 562 bp (lane 2), T7 LHCB1.3 of 500 bp (lane 3). In the gel the marker is a 100bp Ladder (L, New England Biolabs). Oligonucleotides sequences are in **Table S4**.

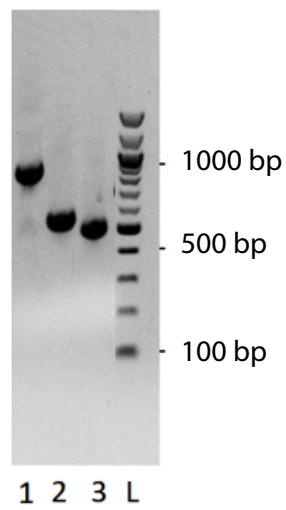



```

Bra017055.1      TTFTCCACCCTCTACGCTCCTCTCATCCGTGATGGACGTATGGAGAAGTTCTACTGGGC      917
BnaC04g46560D-1 TTFTCCACTCTCTACGCTCCTCTCATCCGTGATGGACGTATGGAGAAGTTCTACTGGGC      1200
*****

Bra017055.1      CCGGACCCGTGAGGACCGTATCGGTGTCTGCAAGGGT      954
BnaC04g46560D-1 CCGGACCCGTGAGGATCGTATCGGTGTCTGCAAGGGT      1237
*****

```

### HSP70-1

CLUSTAL Omega (1.2.4) multiple sequence alignment  
<https://plants.ensembl.org/CDY16797=BnaA09g05850D-1>

```

Bra035909.1      GGAATCCCTCCAGCTCCACGTGGTGTCCCCAAATCACTGTCTGCTTCGACATTGACGCC      1239
BnaA09g05850D-1 T7p (22) GGAATCCCTCCAGCTCCACGTTGGTGTCCCTCAGATCACTGTCTGCTTCGACATTGACGCC      384
*****

Bra035909.1      AACGGTATCCTCAACGTCTCTGCCGAGGACAGACCACGGACAGAAGAACAAGATCAC      1299
BnaA09g05850D-1 AACGGTATCCTCAACGTCTCTGTGAGGACAGACCACGGACAGAAGAACAAAGATCAC      444
*****

Cleavage HSP70.1_1:143
Bra035909.1      ATCACCACGACAAGGGTCGTTTGTCCAAGGACGATATCGAGAAGATGGTTCAAGAGGCT      1359
BnaA09g05850D-1 ATCACCAACGACAAGGGTCGTTTGTCCAAGGACGATATCGAGAAGATGGTTCAAGAGGCT      504
*****

Bra035909.1      GAGAAGTACAAGTCTGAGGATGAGGAGCACAAGAAGAAGGTGGAAGCCAAGAACGCTCTC      1419
BnaA09g05850D-1 GAGAAGTACAAGTCTGAGGATGAGGAGCACAAGAAGAAGGTGGAAGCCAAGAACGCGCTC      564
*****

Bra035909.1      GAGAACTACGCGTACAACATGAGGAACACCATCCAGGACGACAAGATTGGTGAGAAGCTA      1479
BnaA09g05850D-1 GAGAACTACGCGTACAACATGAGGAACACCATCCAGGACGACAAGATTGGTGAGAAGCTA      624
*****

Bra035909.1      CCGGCTGCGGACAAGAAGAAGATCGAGGACTCTATTGAGCAGGCGATTTCAGTGGCTGGAG      1539
BnaA09g05850D-1 CCGGCTGCGGACAAGAAGAAGATCGAGGAGTCTATTGAGCAGGCGATTTCAGTGGCTGGAG      684
*****

Bra035909.1      AACAAATCAGCTGGGTGAGGCTGATGAGTTTGAAGACAAGATGAAGGAGTTGGAGAGCATC      1599
BnaA09g05850D-1 AATAATCAGTTGGGTGAGGCTGATGAGTTTGAAGACAAGATGAAGGAGTTGGAGAGCATC      744
*****
Cleavage HSP70.1_2: 467
Bra035909.1      TGCAACCCAATCATTGCCAAGATGTACCAAGGAGCTGGTGGTGAAGCCGCGAGGGATGGAC      1659
BnaA09g05850D-1 TGCAACCCAATCATTGCCAAGATGTACCAAGGAGCTGGTGGTGAAGCCGCTGGGATGGAC      804
*****

Bra035909.1      GATGATGATGCTCCTCCTGCTTCAGGCGGTGCTGGCCCTAAGATCGAAGAGGTGCGACTAA      1719
BnaA09g05850D-1 GATGATGATGCTCCTCCTGCTTCAGGCGGTGCTGGCCCTAAGATCGAAGAGGTGCGACTAA      864
*****

```

### LHCB1.3

CLUSTAL Omega (1.2.4) multiple sequence alignment  
<https://plants.ensembl.org/CDY35271=BnaC03g59520D-1>

```

Bra010807.1      GGCCGTGTGACAATGGGGAAGACCGTAGCCAAGCCAAAGG      130
BnaC03g59520D-1 T7p (22) GGCCGTGTGACAATGAGGAAGACCGTAGCCAAGCCAAAGG      240
*****

Bra010807.1      GCCCATCAGGCAGCCCATGGTACGGGTCCGAAAGAGTCAAGTACTTGGGCCATTCTCCG      190
BnaC03g59520D-1 GCCCATCAGGCAGCCCATGGTACGGATCCGAGAGAGTCAAGTACTTGGGCCATTCTCCG      300
*****

Cleavage LHCB1.3_1: 159
Bra010807.1      GCGAGCCACCGAGCTACCTTACCGGAGAGTTCCAGGAGACTACGGATGGGACACCGCAG      250
BnaC03g59520D-1 GCGAGCCACCGAGCTACCTTACCGGAGAGTTCCCAGGAGGACTACGGATGGGACACCGCAG      360
*****

```

|                 |                                                               |     |
|-----------------|---------------------------------------------------------------|-----|
| Bra010807.1     | GTCTCTCAGCCGATCCCGAGACGTTTCGCAAGGAACCGTGAGCTAGAAGTTATCCACTGCA | 310 |
| BnaC03g59520D-1 | GTCTCTCAGCCGATCCCGAGACGTTTCGCGAGGAACCGTGAGCTAGAAGTTATCCACTGCA | 420 |
|                 | *****                                                         |     |
| Bra010807.1     | GGTGGGCCATGCTCGGAGCCCTAGGCTGCGTCTTCCCTGAGTTGTTGGCCAGGAACGGAG  | 370 |
| BnaC03g59520D-1 | GGTGGGCCATGCTCGGAGCCCTAGGCTGCGTCTTCCCGAGCTGTTGGCCAGGAACGGAG   | 480 |
|                 | ***** ** *                                                    |     |
|                 | Cleavage LHCB1.3_1: 354                                       |     |
| Bra010807.1     | TCAAGTTCGGAGAGGCGGTTTGGTTCAAGGCTGGTTCACAGATCTTCAGCGAAGGAGGGC  | 430 |
| BnaC03g59520D-1 | TCAAGTTCGGAGAGGCGGTTTGGTTCAAGGCGGTTTCGAGATCTTCAGCGAAGGAGGAC   | 540 |
|                 | ***** * *                                                     |     |
| Bra010807.1     | TTGACTACTTGGGAAACCCTAGCTTGGTTCACGCTCAGAGCATCTTGGCTATTTGGGCTA  | 490 |
| BnaC03g59520D-1 | TTGATTACTTGGGAAACCCTAGCTTGGTTCACGCTCAGAGCATCTTGGCTATTTGGGCTA  | 600 |
|                 | *****                                                         |     |
| Bra010807.1     | CTCAAGTGATCTTGATGGGAGCCGTTGAAGGCTACAGAGTCGCAGGAGATGGGCCGTTGG  | 550 |
| BnaC03g59520D-1 | CTCAAGTGATCTTGATGGGAGCCGTTGAAGGTTACAGAGTCGCAGGAGATGGGCCGTTGG  | 660 |
|                 | *****                                                         |     |
| Bra010807.1     | GAGAGGCCGAGGACTTGC                                            | 568 |
| BnaC03g59520D-1 | GAGAGGCCGAGGACTTGC                                            | 678 |
|                 | *****                                                         |     |



**(a) Turnip RCA (*Bra017055.1*)**

read length 21-nt

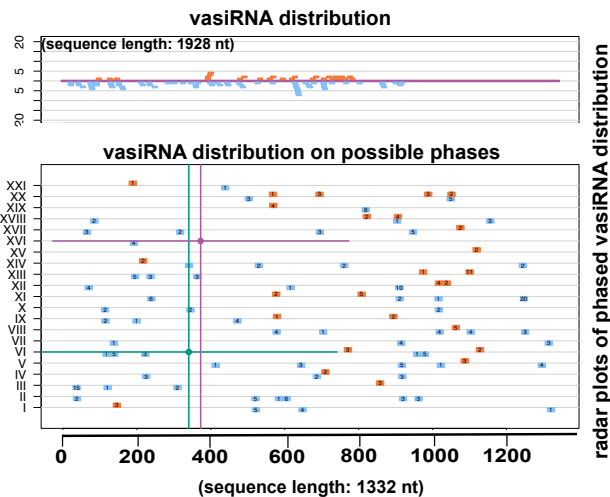

read length 22-nt

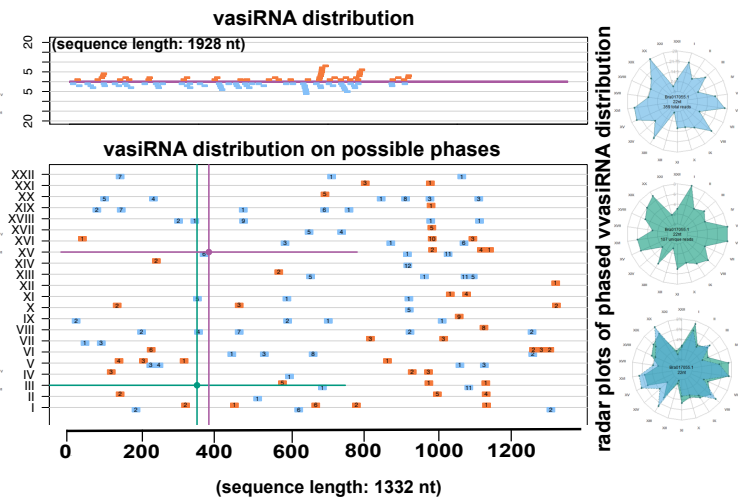

**(b) Oilseed Rape (*BnaC04g46560D-1*)**

read length 21-nt

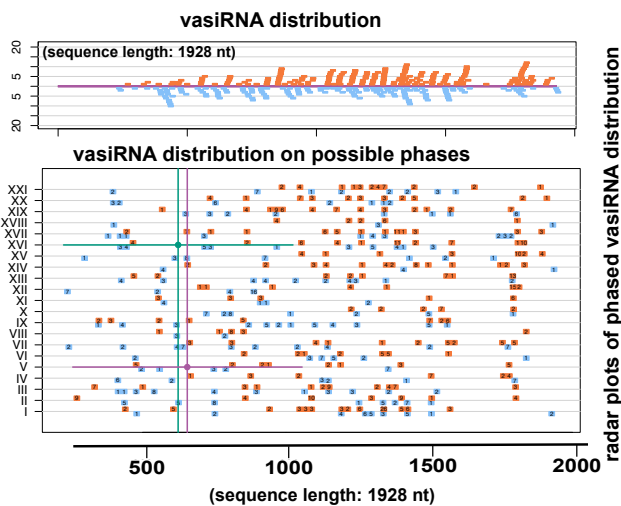

read length 22-nt

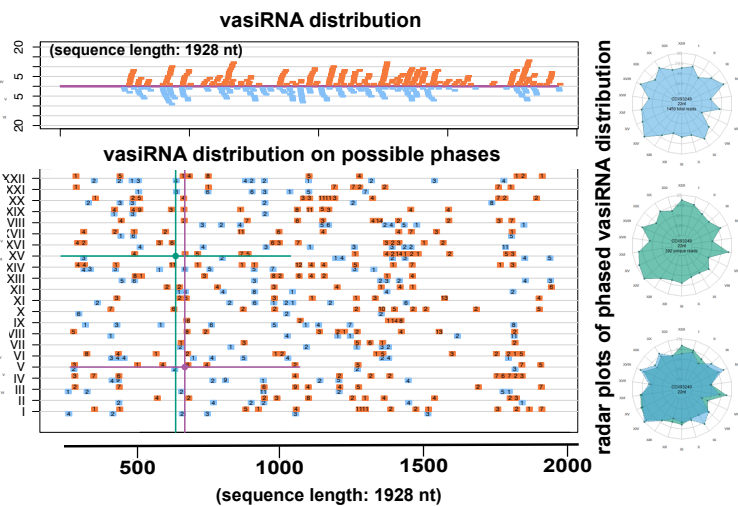

**(c) Turnip HSP70-1 (*Bra035909.1*)**

read length 21-nt

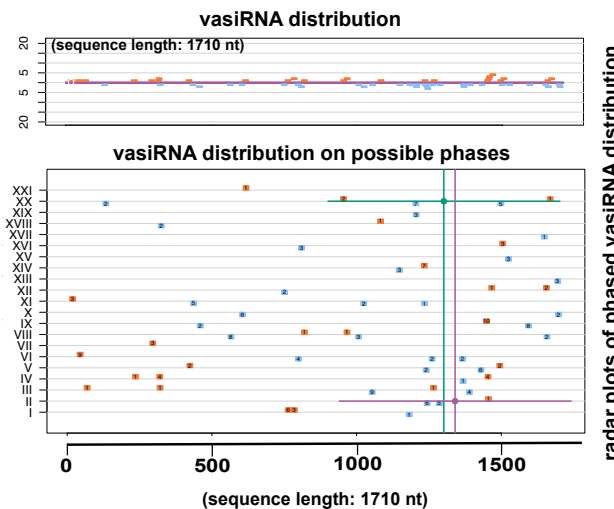

read length 22-nt

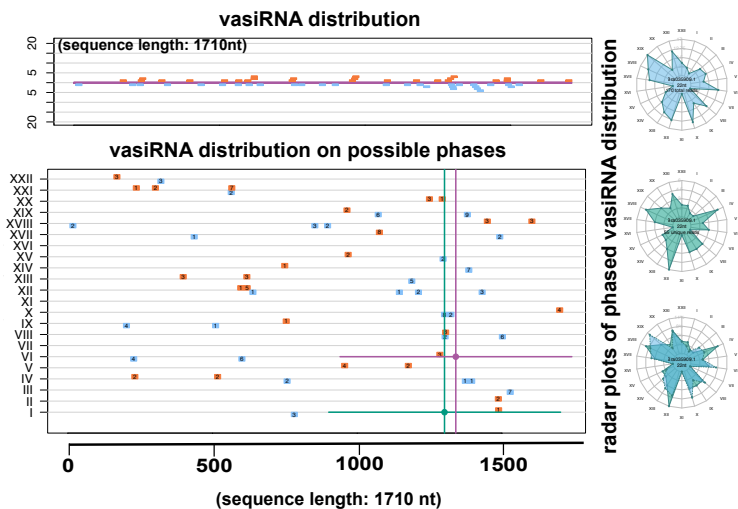

**(d) Oilseed Rape HSP70-1 (*BnaA09g05850D-1*)**

read length 21-nt

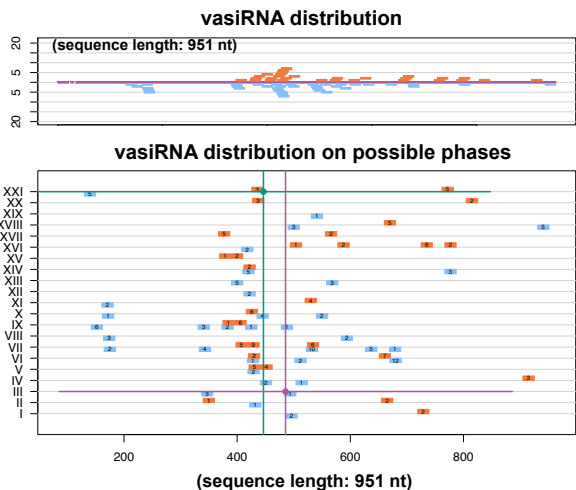

read length 22-nt

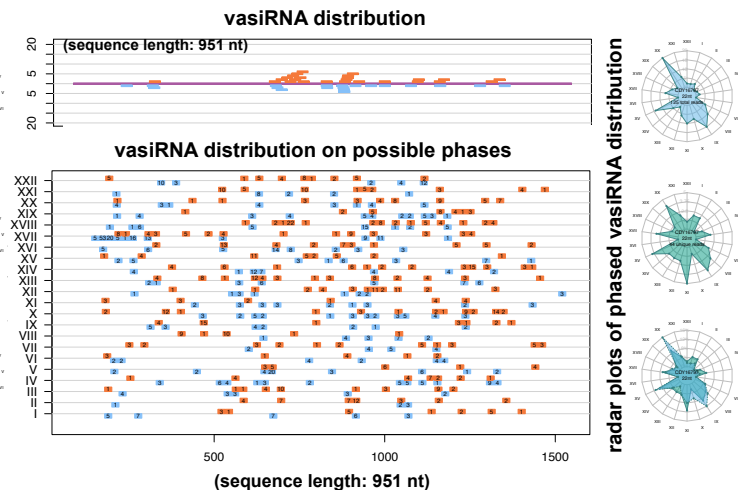

**(e) Turnip LHCb1.4 (*Bra005425.1*)**

read length 21-nt

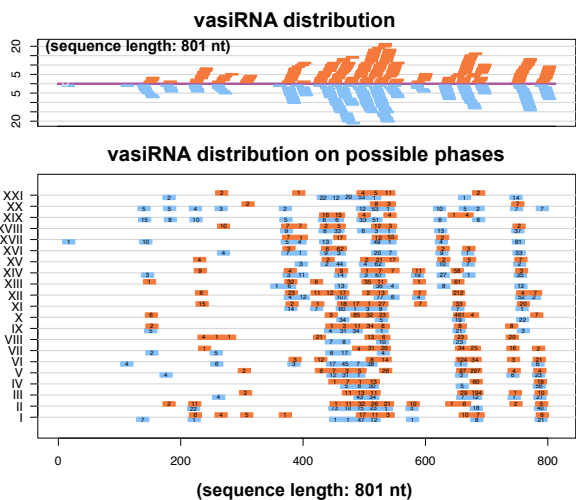

read length 22-nt

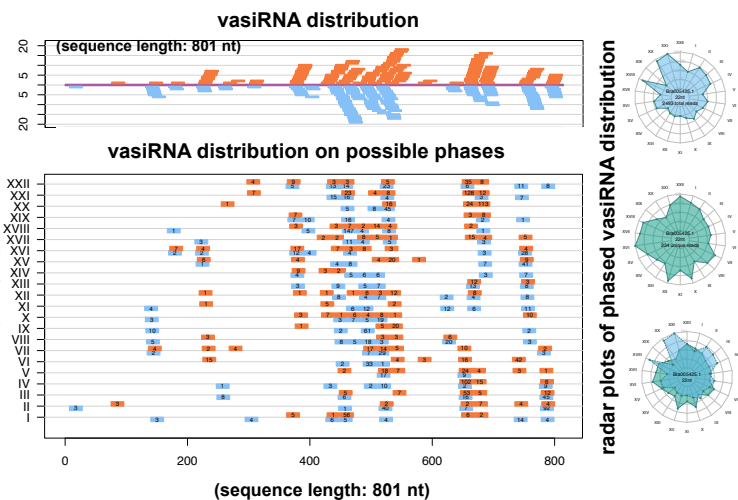

**(f) Oilseed Rape LHCb1.4 (*BnaA05g09410D-1*)**

read length 21-nt

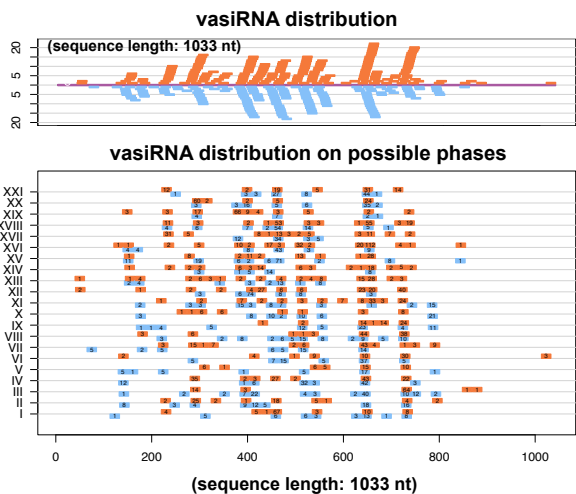

read length 22-nt

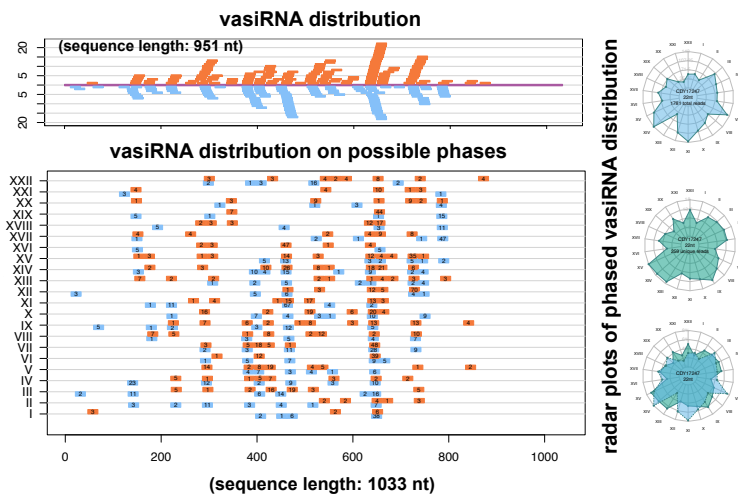

**(g) Turnip SAP (*Bra020123.1*)**

read length 21-nt

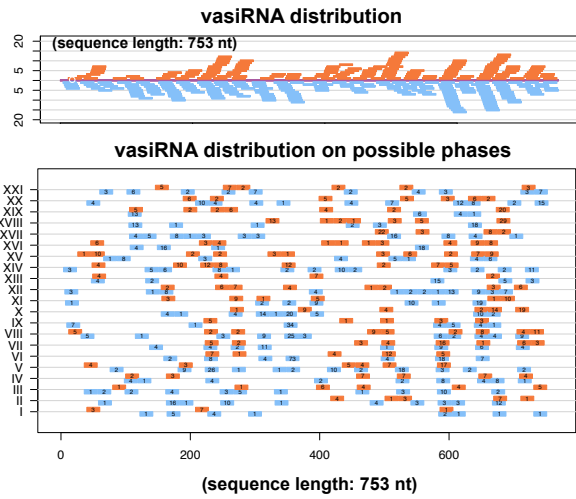

read length 22-nt

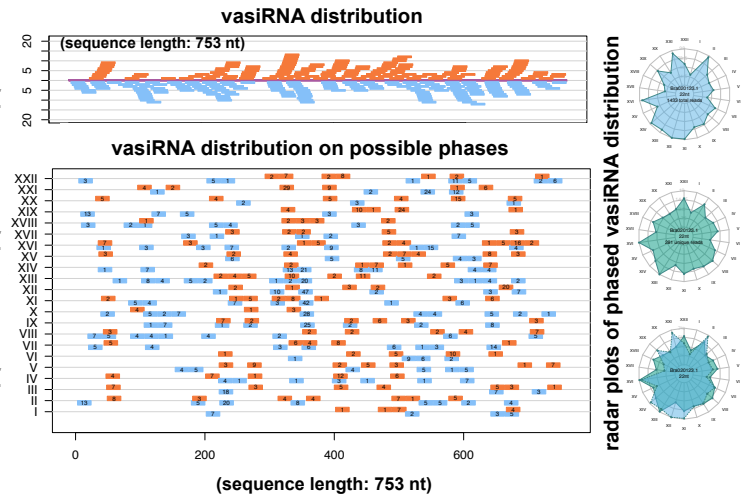

**(h) Oilseed Rape SAP (*BnaA02g05040D-1*)**

read length 21-nt

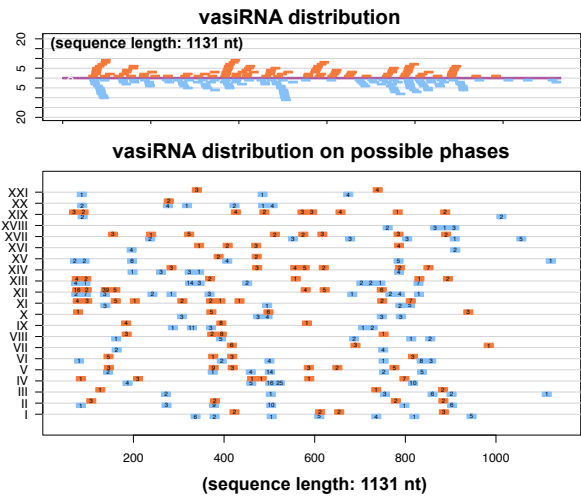

read length 22-nt

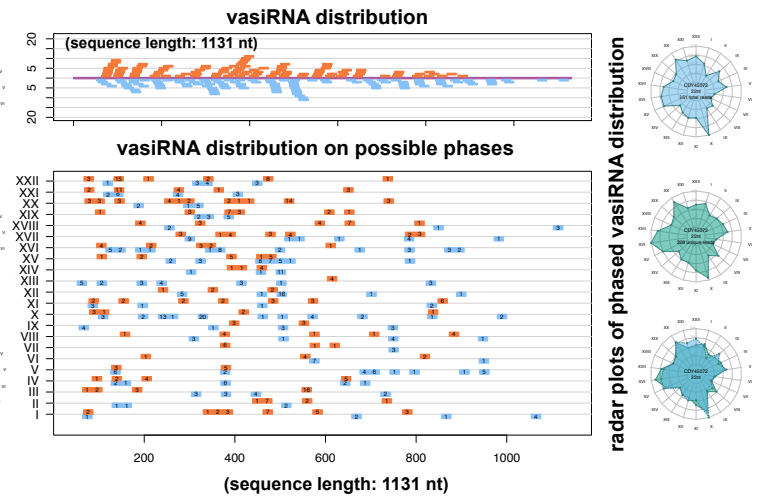

**(i) Turnip FBA-1 (*Bra030303.1*)**

read length 21-nt

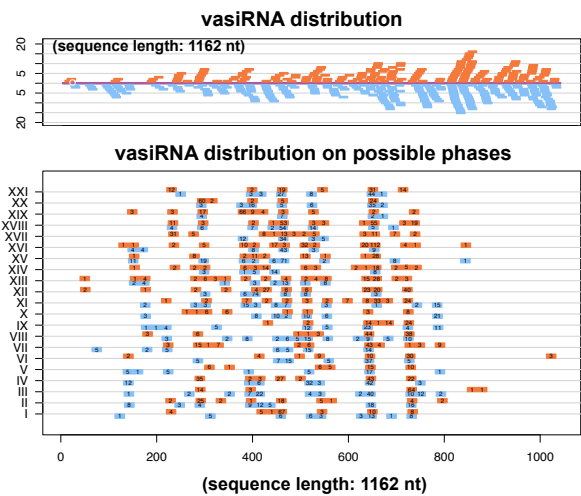

read length 22-nt

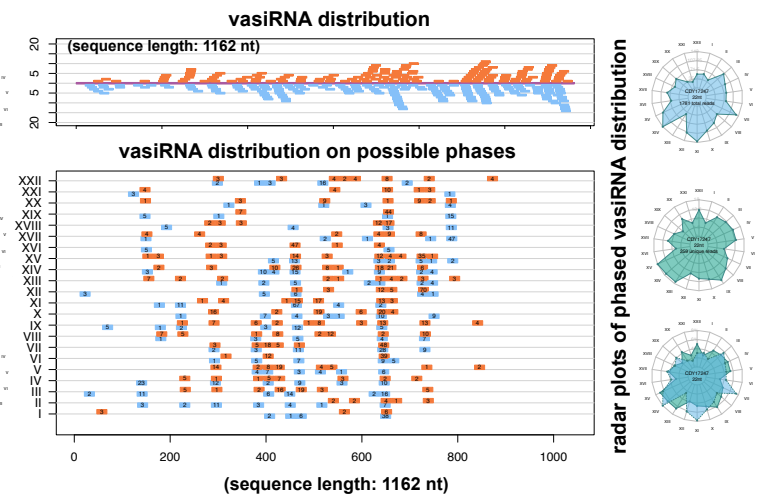

### (j) Oilseed Rape FBA-1 (*BnaA04g12130D-1*)

read length 21-nt

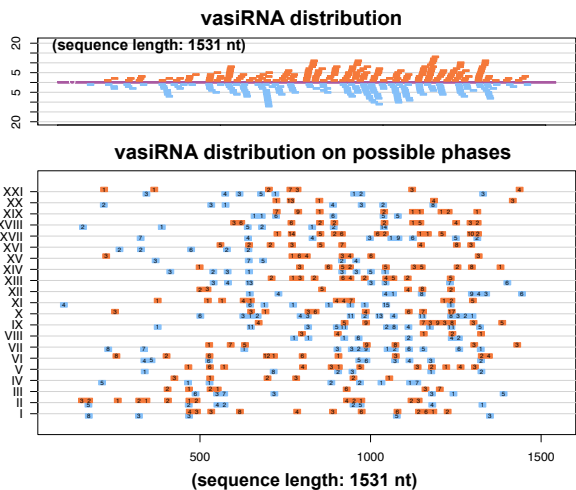

read length 22-nt

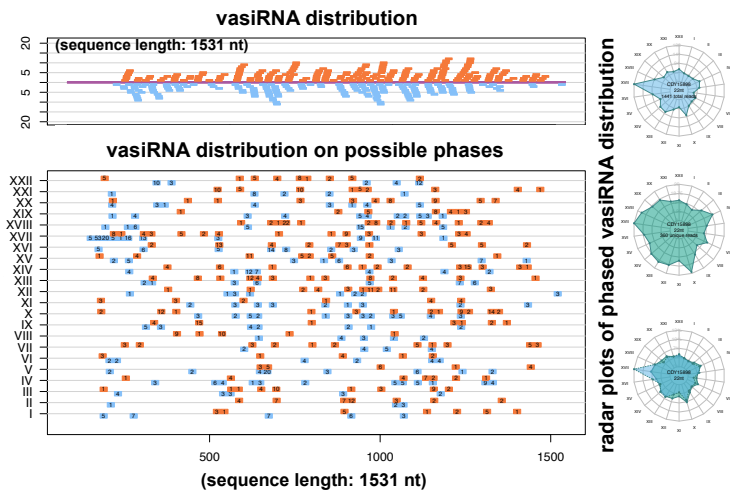

radar plots of phased vasiRNA distribution

radar plots of phased vasiRNA distribution

### (k) Turnip LHCA1 (*Bra003198.1*)

read length 21-nt

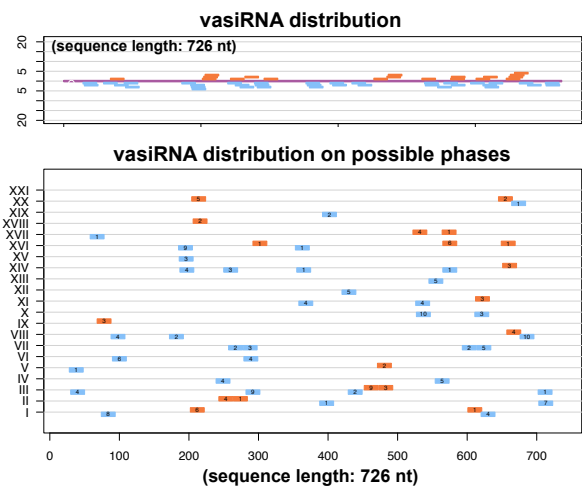

read length 22-nt

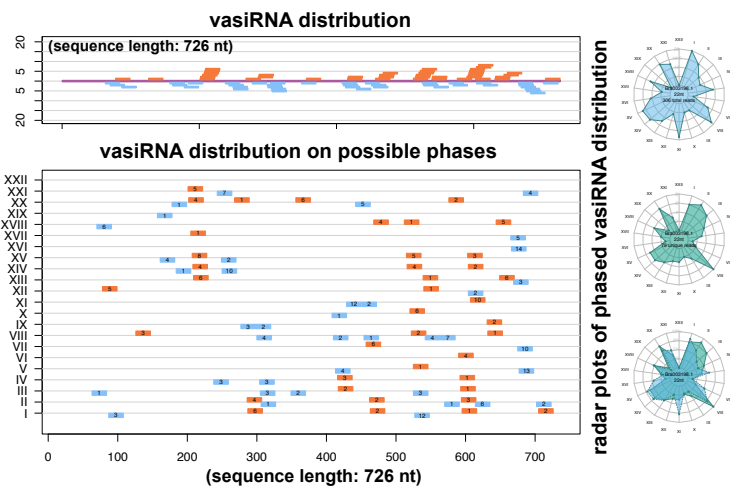

radar plots of phased vasiRNA distribution

radar plots of phased vasiRNA distribution

### (l) Oilseed Rape LHCA1 (*BnaA07g16530D-1*)

read length 21-nt

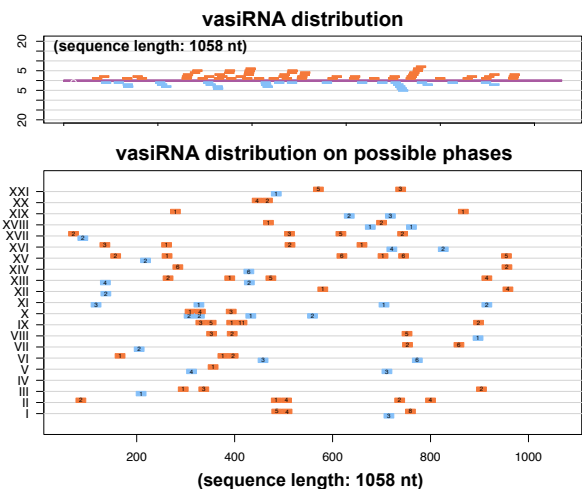

read length 22-nt

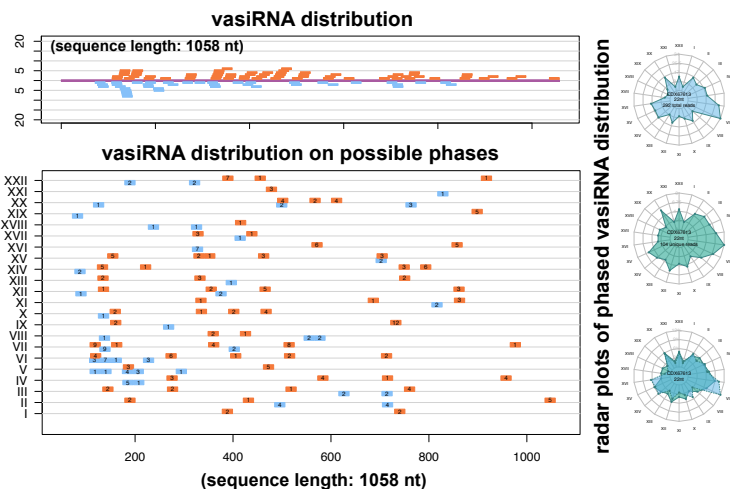

radar plots of phased vasiRNA distribution

radar plots of phased vasiRNA distribution

**Fig. S6. 21- and 22-nt vasiRNAs Distribution and Phasing in *Arabidopsis thaliana*, Turnip and Oilseed Rape.** (a) vasiRNAs distribution along the whole Turnip RCA transcript (*Bra017055.1*, 1332 nt in length) and (b) Oilseed Rape RCA transcript (*BnaC04g46560D-1*, 1928-nt in length). (c) vasiRNAs from Turnip HSP70-1 transcript (*Bra035909.1*, 1710 nt in length) and (d) Oilseed Rape HSP70-1 transcript (*BnaA09g05850D-1*, 951-nt in length). (e) vasiRNAs distribution along the whole Turnip LHCB1.4 transcript (*Bra005425.1*, 801-nt in length) and (f) Oilseed Rape LHCB1.4 transcript (*Bna05g0941D-1*, 1033-nt in length). (g) vasiRNAs distribution along the whole Turnip SAP transcript (*Bra020123.1*, 753-nt in length) and (h) Oilseed Rape SAP transcript (*BnaA02g05040D-1*, 1131-nt in length). (i) vasiRNAs distribution along the whole Turnip FBA-1 transcript (*Bra030303.1*, 1162-nt in length) and (j) Oilseed Rape FAB-1 transcript (*BnaA04g12130D-1*, 1531-nt in length). (k) vasiRNAs distribution along the whole Turnip LHCA1 transcript (*Bra003198.1*, 726-nt in length) and (l) Oilseed Rape LHCA1 transcript (*BnaA07g16530D-1*, 1058-nt in length). Upper panels show unique 21- and 22-nt vasiRNAs distribution along the selected transcript. Number of unique reads at Y axis. Bottom plots represent vasiRNAs distribution along each possible phases at Y axis, i.e. I to XXI (21-nt long vasiRNAs) or I to XXII (22-nt long vasiRNAs). The phase numbered as "I" ends exactly at the 3' end of the transcript, and the others are shifted by one towards 5' end. Each line corresponding to the phase links the reads associated to it, along the transcript. The number in each read shows the number of replicates of the read that were found in the sequencing. Radar plots represent phased unique (top), redundant (middle) and the superimposition of the two (bottom) of 21-22-nt vasiRNAs.

**Fig. S7. Detection and quantification of LHC1.3 transcripts.** (a) Detection of LHC1.3 antisense transcript in Mock-inoculated (M) Turnip tissues. It reports gel-electrophoresis pattern of PCR products obtained using “RT\_minus LHC1.3\_rev/RT\_minus LHC1.3\_for” or “RT\_minus LHC1.3\_rev/RT\_minus LHC1.3\_for” combinations of oligonucleotides (lane 1 with products of 163 bp and 2 with products of 255 bp, respectively). In both cases oligonucleotide “RT\_minus LHC1.3\_for” was used for strand-specific cDNA synthesis.

(b) Strategy used for quantitative detection of sense (in orange) or antisense (in blue) LHC1.3 transcripts. Oligonucleotides “LHC1.3\_6b\_for” or “LHC1.3\_770b\_rev” were used respectively for cDNA synthesis of antisense or sense LHC1.3 RNA transcripts, respectively. Both strand-specific cDNAs encompasses three regions (block 1, 2, 3 in the figure) were used for qPCR. Green and red arrows represent forward and reverse oligonucleotides, respectively (referred to the conventional 5'-3' orientation of the mRNA).

Quantification by qPCR on Turnip (c) and Oilseed Rape (d) of either sense (orange bars) or antisense (blue bars) LHC1.3 transcripts corresponding to blocks 1, 2 and 3. Means were determined from three biological replicates. Data are the mean Log<sub>2</sub> fold changes ± standard deviation of accumulation levels of LHC1.3 transcripts in CaMV-infected relative to Mock-inoculated plant tissues (normalized to the expression of the constitutive gene UBC10). Asterisks indicate that the mean Log<sub>2</sub> fold change is significantly different as determined by Student’s test (“\*”P < 0.05; “\*\*”P < 0.01 ). For oligonucleotide sequences see Table S4.

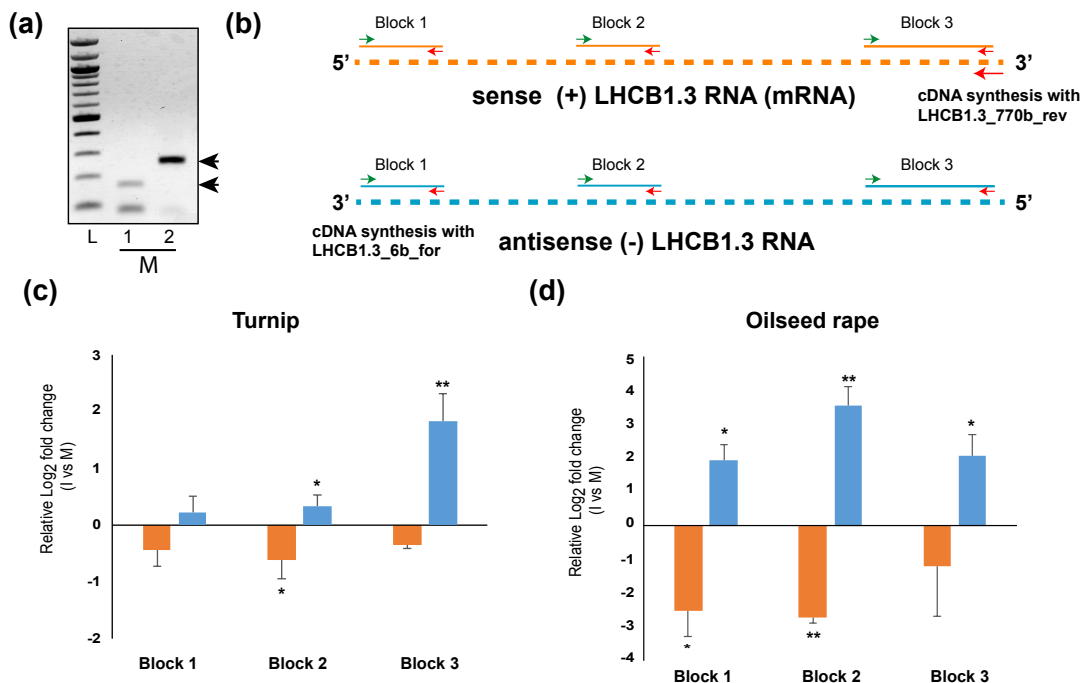



**Table S1** Oligonucleotides used in this study.

| Use                                                       | Primer name           | Sequence (5' to 3')                              |
|-----------------------------------------------------------|-----------------------|--------------------------------------------------|
| qPCR oligonucleotides.                                    | UBC10-R               | ATGGAACACCTTCGTCCTAAA                            |
|                                                           | UBC10-F               | GGGTCTACAGACAGTCTTAC                             |
|                                                           | DCL2-R                | CAGTGTGCAAGGGCTAAGA                              |
|                                                           | DCL2-F                | TTTCAAGTACTACAGTACGTGGAAA                        |
|                                                           | DCL4-R                | GCTGTTCAACCAAAGCCACA                             |
|                                                           | DCL4-F                | GGGAAGACTCACATTGCTGT                             |
|                                                           | RDR1-R2               | TGGGGACGATGTCTTGTTCG                             |
|                                                           | RDR1-F2               | CGCCATCGTTCAGTTCACATC                            |
|                                                           | CP5-F                 | CGTGGGAGATAGCAAAGCTC                             |
|                                                           | CP5-R                 | TCTCCTGCAACCTCTCCTGT                             |
|                                                           | BraAGO2-F             | AAACTGGCCTGAAGCTAACC                             |
|                                                           | BraAGO2-R             | GACACCATCACGGAAGATCA                             |
|                                                           | BnaAGO2-F             | TCGGAGTATACGTTACCA                               |
|                                                           | BnaAGO2-R             | CACAACATCCATCCCTTGC                              |
|                                                           | BraLHCB1.3-F          | AGACTACGGGTGGGACACAG                             |
|                                                           | BraLHCB1.3-R          | TCCGAACCTTGACTCCATTCC                            |
|                                                           | BnaLHCB1.3-F          | TTCCCAGGAGACTACGGATG                             |
|                                                           | BnaLHCB1.3-R          | ATCAAGTCTCCTTCGCTGA                              |
|                                                           | BraSAP-F              | TGGGTACGGAATCTCCAAAG                             |
|                                                           | BraSAP-R              | GAAAACCTTGACCGACGGTGT                            |
|                                                           | BnaSAP-F              | AGCACGGACGAAGAAGAAGA                             |
|                                                           | BnaSAP-R              | TACCGACATCGACCATGAAA                             |
|                                                           | BraHSP70.1-F          | ACCAGCGTTGGAGAGAAGAA                             |
|                                                           | BraHSP70.1-R          | GGGTTTCCGGTAATGTCCTT                             |
|                                                           | BnaHSP70.1-F          | TACCATTCCGACCAAGAAGG                             |
|                                                           | BnaHSP70.1-R          | CGTTGGTGATGGTGATCTTG                             |
|                                                           | RCA-F                 | GTCCAGCTCCCAGGAATGTA                             |
|                                                           | RCA-R                 | ACCCTTGACAGACCCGATAC                             |
| RT-PCR oligonucleotides.                                  | RCA-R                 | ACCCTTGACAGACCCGATAC                             |
|                                                           | <b>T7 RCA-F</b>       | <b>TAATACGACTCACTATAGGGGAAAAGAAAGTTGTAACCG</b>   |
|                                                           | HSP70-R               | TTAGTCGACCTCTTCGATCTTAGG                         |
|                                                           | <b>T7 HSP70-F</b>     | <b>TAATACGACTCACTATAGGGGAATCCCTCCAGCTCCACG</b>   |
|                                                           | LHCB1.3-R             | GCAAGTCCTCGGCCTCTCC                              |
| siRNA guide strands                                       | <b>T7 LHCB1.3-F</b>   | <b>TAATACGACTCACTATAGGGCCGTGTGACAATGAGGAAGAC</b> |
|                                                           | RCA 121               | CUUGGCUGAGGUACUCAUAGG                            |
|                                                           | RCA 1                 | CUUGGCUGAGGUACUCAUAGGA                           |
|                                                           | RCA 2                 | UGUCGUUGGUGAUGGUAUCUU                            |
|                                                           | HSP70 1               | AUCAUGUUGUCCAAGUUGUACU                           |
|                                                           | HSP70 221             | AGCUCCUUGGUACAUCUUGGC                            |
|                                                           | HSP70 2               | AGCUCCUUGGUACAUCUUGGCA                           |
|                                                           | LHCB1.3 121           | AACUCUCCGGUAAGGUAGCUC                            |
| siRNA passenger strands                                   | LHCB1.3 1             | AACUCUCCGGUAAGGUAGCUCG                           |
|                                                           | LHCB1.3 2             | UCUCGGGAUCGGCUGAGAGACC                           |
|                                                           | RCA 121plus           | UAUGAGUACCUCAGCCAAGGU                            |
|                                                           | RCA 1 PLUS            | CUAUGAGUACCUCAGCCAAGGU                           |
|                                                           | RCA 2 PLUS            | UACAACUUGGACAACAUGAUGG                           |
|                                                           | HSP70 1 PLUS          | GAUCACCAUCACCAACGACAAG                           |
|                                                           | HSP70 221 PLUS        | CAAGAUGUACCAAGGAGCUGG                            |
|                                                           | HSP70 2 PLUS          | CCAAGAUGUACCAAGGAGCUGG                           |
| qPCR oligonucleotides (sense and antisense LHCB1.3 RNAs). | LHCB1.3 121PLUS       | GCUACCUUACCGGAGAGUUC                             |
|                                                           | LHCB1.3 1 PLUS        | AGCUACCUUACCGGAGAGUUC                            |
|                                                           | LHCB1.3 2 PLUS        | UCUAUCAGCCGAUCCCGAGACC                           |
|                                                           | LHCB1.3 6b for        | CGCCTCAACAATGGCTCTCT                             |
|                                                           | LHCB1.3 93b rev       | TCTTCCCATTGTACACCGG                              |
|                                                           | LHCB1.3 277b for      | GCAAGGAACCGTGAGCTAGA                             |
|                                                           | LHCB1.3 367b rev      | GCCTCTCCGAACTTGACTCC                             |
|                                                           | LHCB1.3 625b for      | GCGGAGTTGAAGGTGAAGGA                             |
| qPCR oligonucleotides (sense and antisense LHCB1.3 RNAs). | LHCB1.3 770b rev      | AAGTTGGTAGCAAAGGCCCA                             |
|                                                           | RT minus LHCB1.3 for  | GGGAGACTACGGATGGGACCCGC                          |
|                                                           | RT minus LHCB1.3 rev  | CCGCCCTCCCGAACTTGACTCC                           |
|                                                           | RT minus LHCB1.3C for | AGCCAAGATGCTCTGAGCGTG                            |
|                                                           | RT minus LHCB1.3C rev | AGCCAAGATGCTCTGAGCGTG                            |

(In bold and underlined the T7 promoter sequence).

**Table S2. Statistic of small RNAs from Arabidopsis and Brassica sp. related to Fig. 1b.**

|                             |                                      | read                                 | Match with genome | Match with CaMV | read      | Match with genome | Match with CaMV |     |
|-----------------------------|--------------------------------------|--------------------------------------|-------------------|-----------------|-----------|-------------------|-----------------|-----|
| <i>Arabidopsis thaliana</i> | mock                                 | Raw read                             | -                 | -               | -         | -                 | -               |     |
|                             | infected                             | Adapter removed                      | -                 | -               | -         | -                 | -               |     |
|                             |                                      | Filter by sequence length (20-25 nt) | 3,934,819         | 2,941,913       | 388       | 1,017,935         | 633,550         | 168 |
|                             |                                      | Raw read                             | -                 | -               | -         | -                 | -               | -   |
| <i>Brassica rapa</i>        | mock                                 | Raw read                             | 4,267,613         | 1,462,102       | 1227067   | 585,673           | 25705           |     |
|                             | infected                             | Adapter removed                      | 17,269,029        | -               | -         | -                 | -               |     |
|                             |                                      | Filter by sequence length (20-25 nt) | 17,179,167        | -               | -         | -                 | -               |     |
|                             |                                      | Raw read                             | 15,718,199        | 9,972,961       | 1221      | 1,829,782         | 873,898         | 465 |
| <i>Brassica napus</i>       | mock                                 | Raw read                             | 11,500,370        | 5,171,176       | 1991562   | 1,054,620         | 44692           |     |
|                             | infected                             | Adapter removed                      | 16,598,214        | -               | -         | -                 | -               |     |
|                             |                                      | Filter by sequence length (20-25 nt) | 16,440,452        | 11,102,831      | 17077     | 311,724           | 93,344          | 391 |
|                             |                                      | Raw read                             | 14,873,062        | -               | -         | -                 | -               |     |
| infected                    | Adapter removed                      | 13,393,049                           | 6,887,845         | 786578          | 1,852,121 | 1,102,842         | 37848           |     |
|                             | Filter by sequence length (20-25 nt) | 13,354,189                           | -                 | -               | -         | -                 |                 |     |
|                             |                                      | 9,684,196                            | -                 | -               | -         | -                 |                 |     |



**Table S3.**  $\chi^2$  test and fold change evaluation for unique read counts, grouped by length (nt). Related to Fig. 1d.

| Plant               | Read length | Mock raw counts | Infected raw counts | Mock ppm     | Infected ppm | Fold Change (FC) | Logarithmic Fold Change (log2FC) | Adjusted p-value    |
|---------------------|-------------|-----------------|---------------------|--------------|--------------|------------------|----------------------------------|---------------------|
| Arabidopsis         | 20          | 57737           | 40555               | 5672         | 4585         | 0,81             | -0,31                            | < 2.2E-16           |
| Arabidopsis         | 21          | 311193          | 155490              | 30571        | 17579        | 0,58             | -0,80                            | < 2.2E-16           |
| <b>Arabidopsis</b>  | <b>22</b>   | <b>81689</b>    | <b>128450</b>       | <b>8025</b>  | <b>14522</b> | <b>1,81</b>      | <b>0,86</b>                      | <b>&lt; 2.2E-16</b> |
| Arabidopsis         | 23          | 156436          | 87833               | 15368        | 9930         | 0,65             | -0,63                            | < 2.2E-16           |
| Arabidopsis         | 24          | 352440          | 428240              | 34623        | 48415        | 1,40             | 0,48                             | < 2.2E-16           |
| Arabidopsis         | 25          | 58440           | 43943               | 5741         | 4968         | 0,87             | -0,21                            | < 2.2E-16           |
| Turnip              | 20          | 64372           | 107232              | 3518         | 4750         | 1,35             | 0,43                             | < 2.2E-16           |
| Turnip              | 21          | 547672          | 480061              | 29931        | 21265        | 0,71             | -0,49                            | < 2.2E-16           |
| <b>Turnip</b>       | <b>22</b>   | <b>186638</b>   | <b>396600</b>       | <b>10200</b> | <b>17568</b> | <b>1,72</b>      | <b>0,78</b>                      | <b>&lt; 2.2E-16</b> |
| Turnip              | 23          | 248064          | 339756              | 13557        | 15050        | 1,11             | 0,15                             | < 2.2E-16           |
| Turnip              | 24          | 760567          | 867924              | 41566        | 38446        | 0,92             | -0,11                            | < 2.2E-16           |
| Turnip              | 25          | 22470           | 65942               | 1228         | 2921         | 2,38             | 1,25                             | < 2.2E-16           |
| Oilseed rape        | 20          | 12625           | 174765              | 4050         | 9436         | 2,33             | 1,22                             | < 2.2E-16           |
| Oilseed rape        | 21          | 66089           | 396376              | 21201        | 21401        | 1,01             | 0,01                             | 0,051078709         |
| <b>Oilseed rape</b> | <b>22</b>   | <b>31958</b>    | <b>339733</b>       | <b>10252</b> | <b>18343</b> | <b>1,79</b>      | <b>0,84</b>                      | <b>&lt; 2.2E-16</b> |
| Oilseed rape        | 23          | 51001           | 299987              | 16361        | 16197        | 0,99             | -0,01                            | 0,051467887         |
| Oilseed rape        | 24          | 143271          | 535096              | 45961        | 28891        | 0,63             | -0,67                            | < 2.2E-16           |
| Oilseed rape        | 25          | 6780            | 106163              | 2175         | 5732         | 2,64             | 1,40                             | < 2.2E-16           |

|                          |                                        |
|--------------------------|----------------------------------------|
| <b>Cell color legend</b> | Significant result                     |
|                          | FC < 0.66 equivalent to log2FC < -0.58 |
|                          | FC > 1.5 equivalent to log2FC > 0.58   |
|                          | Adjusted p-value < 0.05                |

N.B. Adjusted p-value < 2.2E-16 is a value close to 0, limited by computable floating point precision

**Table S4.** Output of unique 21-nt and 22-nt vasiRNA analysis in mock-inoculated and CaMV-infected tissues, referred to each gene in Table 1.

| NAME    | A. thaliana  |    |     | Mock      |     |     | CaMV       |             |     | Turnip |            |     | Mock |             |                 | CaMV |    |          | Oileseed rape |     |             | Mock |    |     | CaMV |  |  |
|---------|--------------|----|-----|-----------|-----|-----|------------|-------------|-----|--------|------------|-----|------|-------------|-----------------|------|----|----------|---------------|-----|-------------|------|----|-----|------|--|--|
|         | 21           | 22 | tot | 21        | 22  | tot | 21         | 22          | tot | 21     | 22         | tot | 21   | 22          | tot             | 21   | 22 | tot      | 21            | 22  | tot         | 21   | 22 | tot |      |  |  |
| SAP     | AT5G20700.1  | 13 | 6   | <b>19</b> | 120 | 152 | <b>272</b> | Bra020123.1 | 13  | 3      | <b>16</b>  | 320 | 281  | <b>601</b>  | BnaA02g05040D-1 | 4    | 3  | <b>7</b> | 207           | 208 | <b>415</b>  |      |    |     |      |  |  |
| ATPase  | AT2G18193.1  | 0  | 0   | <b>0</b>  | 22  | 50  | <b>72</b>  | Bra024477.1 | 1   | 0      | <b>1</b>   | 79  | 42   | <b>121</b>  | BnaA02g05040D-1 | 0    | 0  | <b>0</b> | 65            | 37  | <b>102</b>  |      |    |     |      |  |  |
| ABCG36  | AT1G59870.1  | 2  | 1   | <b>3</b>  | 43  | 70  | <b>113</b> | Bra003527.1 | 2   | 2      | <b>4</b>   | 80  | 100  | <b>180</b>  | BnaA07g19610D-1 | 1    | 0  | <b>1</b> | 118           | 112 | <b>230</b>  |      |    |     |      |  |  |
| CP5     | AT1G664720.1 | 7  | 4   | <b>11</b> | 50  | 57  | <b>107</b> | Bra017435.1 | 0   | 0      | <b>0</b>   | 33  | 36   | <b>69</b>   | BnaC09g20830D-1 | 1    | 0  | <b>1</b> | 33            | 64  | <b>97</b>   |      |    |     |      |  |  |
| ACT2    | AT3G18780.1  | 3  | 2   | <b>6</b>  | 27  | 39  | <b>66</b>  | Bra037560.1 | 5   | 1      | <b>6</b>   | 112 | 161  | <b>273</b>  | BnaA01g26500D-1 | 1    | 2  | <b>3</b> | 450           | 764 | <b>1214</b> |      |    |     |      |  |  |
| RPT2    | AT2G30520.1  | 2  | 2   | <b>4</b>  | 36  | 61  | <b>97</b>  | Bra018309.1 | 2   | 0      | <b>2</b>   | 49  | 56   | <b>105</b>  | BnaA05g11930D-1 | 0    | 0  | <b>0</b> | 25            | 52  | <b>77</b>   |      |    |     |      |  |  |
| CAT3    | AT1G20620.4  | 10 | 5   | <b>15</b> | 151 | 215 | <b>366</b> | Bra016459.1 | 0   | 0      | <b>0</b>   | 51  | 56   | <b>107</b>  | BnaA08g21730D-1 | 0    | 0  | <b>0</b> | 67            | 92  | <b>159</b>  |      |    |     |      |  |  |
| GUNSS   | AT5G13630.2  | 5  | 1   | <b>6</b>  | 54  | 99  | <b>153</b> | Bra006208.1 | 5   | 4      | <b>9</b>   | 45  | 56   | <b>101</b>  | BnaA03g04440D-1 | 1    | 0  | <b>1</b> | 78            | 82  | <b>160</b>  |      |    |     |      |  |  |
| FBA1    | AT2G21330.2  | 2  | 3   | <b>5</b>  | 29  | 39  | <b>68</b>  | Bra030303.1 | 7   | 2      | <b>9</b>   | 405 | 313  | <b>718</b>  | BnaA04g12130D-1 | 2    | 0  | <b>2</b> | 361           | 360 | <b>721</b>  |      |    |     |      |  |  |
| HSP70-1 | AT5G02500.1  | 5  | 7   | <b>12</b> | 128 | 117 | <b>245</b> | Bra035909.1 | 5   | 2      | <b>7</b>   | 57  | 55   | <b>112</b>  | BnaA09g05850D-1 | 0    | 1  | <b>1</b> | 65            | 44  | <b>109</b>  |      |    |     |      |  |  |
| LHCA1   | AT3G54890.2  | 6  | 6   | <b>12</b> | 21  | 40  | <b>61</b>  | Bra003198.1 | 4   | 5      | <b>9</b>   | 55  | 79   | <b>134</b>  | BnaA07g16530D-1 | 1    | 0  | <b>1</b> | 87            | 104 | <b>191</b>  |      |    |     |      |  |  |
| LHCB1.3 | AT1G29930.1  | 29 | 27  | <b>56</b> | 453 | 365 | <b>818</b> | Bra010807.1 | 77  | 27     | <b>104</b> | 658 | 499  | <b>1157</b> | BnaC03g59520D-1 | 7    | 1  | <b>8</b> | 762           | 606 | <b>1368</b> |      |    |     |      |  |  |
| LHCB1.4 | AT2G34430.1  | 12 | 3   | <b>15</b> | 170 | 124 | <b>294</b> | Bra005425.1 | 21  | 6      | <b>27</b>  | 332 | 235  | <b>567</b>  | BnaA05g09410D-1 | 1    | 0  | <b>1</b> | 355           | 259 | <b>614</b>  |      |    |     |      |  |  |
| LOS1    | AT1G56070.3  | 9  | 6   | <b>15</b> | 47  | 60  | <b>107</b> | Bra020542.1 | 5   | 0      | <b>5</b>   | 113 | 130  | <b>243</b>  | BnaA02g31580D-1 | 1    | 0  | <b>1</b> | 77            | 63  | <b>140</b>  |      |    |     |      |  |  |
| NFXL1   | AT1G10170.1  | 0  | 0   | <b>0</b>  | 108 | 120 | <b>228</b> | Bra018458.1 | 0   | 0      | <b>0</b>   | 38  | 33   | <b>71</b>   | BnaC08g14030D-1 | 0    | 0  | <b>0</b> | 81            | 72  | <b>153</b>  |      |    |     |      |  |  |
| RCA     | AT2G39730.3  | 17 | 13  | <b>30</b> | 36  | 49  | <b>85</b>  | Bra017055.1 | 14  | 10     | <b>24</b>  | 91  | 107  | <b>198</b>  | BnaC04g46560D-1 | 1    | 1  | <b>2</b> | 333           | 392 | <b>725</b>  |      |    |     |      |  |  |

**Table S5.** Microarray comparison of expression profiles of CP5, HSP70-1 and SAP. CaMV-infected *Arabidopsis thaliana* Col-0, dcl2-dcl4, dcl2-dcl3 and dcl4-dcl3 double mutants were compared to those of control plants. In orange and blue, the Log2fold that change greater than two folds. \*CATMA5A01580 is used in substitution to the CATMA5A01540 for HSP70-1 because the latter is not available for this combination.

| Comparison                   | ID microarray | Log2 fold change | Fold change | Gene      | Description |
|------------------------------|---------------|------------------|-------------|-----------|-------------|
| Col-0_CaMV_vs_Col-0_Mock     | CATMA1A54045  | -0,11            | 0,927230546 | AT1G64720 | CP5         |
|                              | CATMA4A01540  | -1,23            | 0,425431865 | AT5G02500 | HSP70-1     |
|                              | CATMA5A19230  | -2,85            | 0,138696184 | AT5G20700 | SAP         |
| dcl2_dcl4_CaMV_vs_Col-0_CaMV | CATMA1A54045  | 2,34             | 5,052509047 | AT1G64720 | CP5         |
|                              | CATMA5A01580* | 0,83             | 1,782620992 | AT5G02500 | HSP70-1     |
|                              | CATMA5A19230  | 2,00             | 4,011105744 | AT5G20700 | SAP         |
| dcl2_dcl3_CaMV_vs_Col-0_CaMV | CATMA1A54045  | 0,87             | 1,823866331 | AT1G64720 | CP5         |
|                              | CATMA4A01540  | 1,06             | 2,077718207 | AT5G02500 | HSP70-1     |
|                              | CATMA5A19230  | 1,33             | 2,507066041 | AT5G20700 | SAP         |
| dcl3_dcl4_CaMV_vs_Col-0_CaMV | CATMA1A54045  | 0,68             | 1,601029621 | AT1G64720 | CP5         |
|                              | CATMA4A01540  | -0,31            | 0,804408371 | AT5G02500 | HSP70-1     |
|                              | CATMA5A19230  | 1,30             | 2,46058269  | AT5G20700 | SAP         |
